# Supplementary material
Source: Elsevier journal article supplement (https://www.sciencedirect.com/science/article/pii/S2387020617301742)
Supplement: mmc2 [file S2387020617301742:mmc2.doc]

| Trails | Random  sequence  generation | Allocation  concealment | Blinding of  participants  and personnel | Blinding of  outcome  assessment | Incomplete  outcome  data | Selective  reporting | Other  bias |
| --- | --- | --- | --- | --- | --- | --- | --- |
| Firouzi,S 2016 | Low | Low | Low | Low | Low | Low | Low |
| Asemi,Z 2015 | Unclear | Unclear | Low | Low | Low | Low | Low |
| Tonucci，L 2015 | Low | low | Low | Low | Low | Low | Low |
| Hove,KD 2015 | Low | low | Low | Low | Low | Low | Low |
| Tajadadi,E 2014 | Unclear | Unclear | Low | Low | Low | Low | Low |
| Mohamod 2014 | Low | low | High | High | Low | Low | Low |
| Asemi,Z 2014 | Unclear | Unclear | Low | Low | Low | Low | Low |
| Shakeri,H 2014 | Unclear | Unclear | Unclear | Unclear | Low | Low | Low |
| Asemi,Z 2013 | Unclear | Unclear | Unclear | Unclear | Low | Low | Low |
| Mazloom 2013 | Low | Low | High | High | Low | Low | Low |
| Moroti,C 2012 | Low | Low | Low | Low | Low | Low | Low |

**Sup Table.1**  Risk of bias assessment of included studies
